# Supplementary material for: Associations between markers of inflammation and altered pain perception mechanisms in people with knee osteoarthritis: a systematic review
Source: PubMed Central journal article supplement — RMD Open. 2023 May 24;9(2):e002945. doi: 10.1136/rmdopen-2022-002945 (PMC10231007; doi:10.1136/rmdopen-2022-002945), 2023-05-24
Supplement: rmdopen-2022-002945supp002.pdf [file rmdopen-2022-002945supp002.pdf]

| Research question: association between joint inflammation and altered pain processing in patients with knee OA |              |                                                                                                                                                                                                                                                                                                                                                                                                                                                                                                                                                                                                                                                                                                                                                                                                                                                                                                                                                                                                                                                                                                                                                                                                                                                                                               |                       |
|----------------------------------------------------------------------------------------------------------------|--------------|-----------------------------------------------------------------------------------------------------------------------------------------------------------------------------------------------------------------------------------------------------------------------------------------------------------------------------------------------------------------------------------------------------------------------------------------------------------------------------------------------------------------------------------------------------------------------------------------------------------------------------------------------------------------------------------------------------------------------------------------------------------------------------------------------------------------------------------------------------------------------------------------------------------------------------------------------------------------------------------------------------------------------------------------------------------------------------------------------------------------------------------------------------------------------------------------------------------------------------------------------------------------------------------------------|-----------------------|
| NAME OF DATABASE (interface): MEDLINE (via PubMed interface)                                                   |              |                                                                                                                                                                                                                                                                                                                                                                                                                                                                                                                                                                                                                                                                                                                                                                                                                                                                                                                                                                                                                                                                                                                                                                                                                                                                                               |                       |
| Concept                                                                                                        | Line number  | Search strategy                                                                                                                                                                                                                                                                                                                                                                                                                                                                                                                                                                                                                                                                                                                                                                                                                                                                                                                                                                                                                                                                                                                                                                                                                                                                               | Results (13 Dec 2022) |
| Concept 1:<br>Knee OA                                                                                          | 1a: OA, knee | ("Osteoarthritis, Knee"[Mesh] OR "osteoarthritis knee"[TIAB] OR "knee osteoarthritis"[TIAB] OR "gonarthrosis"[TIAB] OR "Osteoarthritis of Knee"[TIAB] OR "Osteoarthritis of Knees"[TIAB] OR "Knee OA"[TIAB])                                                                                                                                                                                                                                                                                                                                                                                                                                                                                                                                                                                                                                                                                                                                                                                                                                                                                                                                                                                                                                                                                  | 32.043                |
|                                                                                                                | 1b: knee     | ("Knee Joint"[Mesh] OR "Knee"[Mesh] OR "knee"[TIAB] OR "knees"[TIAB] OR "Patella"[Mesh] OR "patella"[TIAB])                                                                                                                                                                                                                                                                                                                                                                                                                                                                                                                                                                                                                                                                                                                                                                                                                                                                                                                                                                                                                                                                                                                                                                                   | 199.333               |
|                                                                                                                | 1c: OA       | ("Osteoarthritis"[Mesh] OR "osteoarthriti*"[TIAB] OR "osteo-arthriti*"[TIAB] OR "osteoarthrotic"[TIAB] OR "osteoarthros*"[TIAB] OR "osteo-arthros*"[TIAB] OR "arthrosis"[TIAB] OR "degenerative joint disease"[TIAB] OR "Arthritis"[TIAB] OR "Arthritides"[TIAB])                                                                                                                                                                                                                                                                                                                                                                                                                                                                                                                                                                                                                                                                                                                                                                                                                                                                                                                                                                                                                             | 299.464               |
| Concept 2:<br>Inflammation                                                                                     | 2            | "Synovitis"[Mesh] OR "Synovitis"[TIAB] OR "hoffasynovitis"[TIAB] OR "hoffa-synovitis"[TIAB] OR "synovium"[TIAB] OR "Synovial Membrane"[Mesh] OR "Synovial Membrane"[TIAB] OR "synovial fluid*"[TIAB] OR "synovial thickening"[TIAB] OR "synovial proliferation"[TIAB] OR "Hydrarthrosis"[Mesh] OR "Hydrarthrosis"[TIAB] OR "effusion"[TIAB] OR "Cytokines"[Mesh] OR "Cytokine*"[TIAB] OR "chemokine*"[TIAB] OR "interleukin*"[TIAB] OR "IL-*"[TIAB] OR "Tumor Necrosis Factor*"[TIAB] OR "TNF"[TIAB] OR "C-Reactive Protein"[Mesh] OR "C-Reactive Protein"[TIAB] OR "CRP"[TIAB] OR "Matrix Metalloproteinases"[Mesh] OR "Matrix Metalloproteinase*"[TIAB] OR "MMP"[TIAB] OR "Bradykinin"[Mesh] OR "Bradykinin"[TIAB] OR "Inflammation"[Mesh] OR "Inflammation"[TIAB] OR "Inflammation Mediators"[Mesh] OR "Biomarkers"[Mesh] OR "Biomarker*"[TIAB] OR "biological marker*"[TIAB] OR "Bone Marrow Diseases"[Mesh] OR "Bone Marrow Disease*"[TIAB] OR "bone marrow lesion*"[TIAB] OR "BML"[TIAB] OR "BMLs"[TIAB] OR "bone marrow edema"[TIAB] OR "Magnetic Resonance Imaging"[Mesh] OR "Magnetic Resonance Imaging"[TIAB] OR "MRI"[TIAB] OR "Ultrasonography"[Mesh] OR "Ultrasonography"[TIAB] OR "US"[TIAB] OR "synovial sample*"[TIAB] OR "synovial biopsy"[TIAB] OR "synovial biopsy*"[TIAB] | 4.601.086             |
| Concept 3:<br>Pain                                                                                             | 3            | "Central Nervous System Sensitization"[Mesh] OR "Sensitization"[TIAB] OR "Sensitisation"[TIAB] OR "pain receptor*"[TIAB] OR "Nociceptors"[Mesh] OR "Nociceptor*"[TIAB] OR "quantitative sensory testing"[TIAB] OR "QST"[TIAB] OR "Postsynaptic Potential Summation"[Mesh] OR "Postsynaptic Potential Summation"[TIAB] OR "temporal summation"[TIAB] OR "TS"[TIAB] OR "pain modulation"[TIAB] OR "CPM"[TIAB] OR "Pain pressure threshold"[TIAB] OR "PPT"[TIAB] OR "algometry"[TIAB] OR "HPT"[TIAB] OR "sensory                                                                                                                                                                                                                                                                                                                                                                                                                                                                                                                                                                                                                                                                                                                                                                                 | 614.810               |

|                                      |                                                                                                                                                                                                                                                                                                                                                                                                                                                                                                                                                                                                                                                                                                                                                                                                                                                                                                                                                                                                            |     |
|--------------------------------------|------------------------------------------------------------------------------------------------------------------------------------------------------------------------------------------------------------------------------------------------------------------------------------------------------------------------------------------------------------------------------------------------------------------------------------------------------------------------------------------------------------------------------------------------------------------------------------------------------------------------------------------------------------------------------------------------------------------------------------------------------------------------------------------------------------------------------------------------------------------------------------------------------------------------------------------------------------------------------------------------------------|-----|
|                                      | thresholds"[TIAB] OR "allodynia"[TIAB] OR "pain DETECT"[TIAB] OR "PD-Q"[TIAB] OR "PDQ"[TIAB] OR "central sensitization inventory" OR "CSI"[TIAB] OR "Hyperexcitability"[TIAB] OR "Pain Perception"[Mesh] OR "Pain Perception"[TIAB] OR "Pain Threshold"[Mesh] OR "Pain Threshold"[TIAB] OR "Central Sensitivity"[TIAB] OR "Neural Inhibition"[Mesh] OR "Neural Inhibition"[TIAB] OR "Hyperalgesia"[Mesh] OR "Hyperalgesia"[TIAB] OR "nociception"[TIAB] OR "Hypersensitivity"[Mesh] OR "Hypersensitivity"[TIAB] OR "pain processing"[TIAB] OR "pain modulation"[TIAB] OR "neuropathic pain"[TIAB] OR "neuropathic-like pain"[TIAB] OR "nociceptive pain"[TIAB] OR "pain pathophysiology"[TIAB] OR "pain mechanism*"[TIAB] OR "intermittent pain"[TIAB] OR "ICOAP"[TIAB] OR "widespread pain"[TIAB] OR "Neuropathic Pain Questionnaire"[TIAB] OR "NPQ"[TIAB] OR "Douleur neuropathique"[TIAB] OR "DN-4"[TIAB] OR "DN4"[TIAB] OR "Leeds Assessment of Neuropathic Symptoms and Signs"[TIAB] OR "LANSS"[TIAB] |     |
| Pubmed<br>Combination<br>of concepts | (1a OR (1b AND 1c)) AND 2 AND 3                                                                                                                                                                                                                                                                                                                                                                                                                                                                                                                                                                                                                                                                                                                                                                                                                                                                                                                                                                            | 634 |

| Research question: association between joint inflammation and altered pain processing in patients with knee OA |             |                                                                                                                                                                                                                                                                                                                                                                                                                                                                                                                                                                                                                                                                                                                                                                                                                                                                                                                                                                                                                                                                                                                                                                                                                                                                                                                                                                     |                       |
|----------------------------------------------------------------------------------------------------------------|-------------|---------------------------------------------------------------------------------------------------------------------------------------------------------------------------------------------------------------------------------------------------------------------------------------------------------------------------------------------------------------------------------------------------------------------------------------------------------------------------------------------------------------------------------------------------------------------------------------------------------------------------------------------------------------------------------------------------------------------------------------------------------------------------------------------------------------------------------------------------------------------------------------------------------------------------------------------------------------------------------------------------------------------------------------------------------------------------------------------------------------------------------------------------------------------------------------------------------------------------------------------------------------------------------------------------------------------------------------------------------------------|-----------------------|
| NAME OF DATABASE (interface): EMBASE                                                                           |             |                                                                                                                                                                                                                                                                                                                                                                                                                                                                                                                                                                                                                                                                                                                                                                                                                                                                                                                                                                                                                                                                                                                                                                                                                                                                                                                                                                     |                       |
| Concept                                                                                                        | Line number | Search strategy                                                                                                                                                                                                                                                                                                                                                                                                                                                                                                                                                                                                                                                                                                                                                                                                                                                                                                                                                                                                                                                                                                                                                                                                                                                                                                                                                     | Results (13 Dec 2022) |
| Concept 1:<br>Knee OA                                                                                          | #1          | 'knee osteoarthritis'/exp OR 'knee osteoarthritis':ti,ab,kw OR 'osteoarthritis knee':ti,ab,kw OR gonarthrosis:ti,ab,kw OR 'osteoarthritis of Knee':ti,ab,kw OR 'Osteoarthritis of Knees':ti,ab,kw OR 'Knee OA':ti,ab,kw                                                                                                                                                                                                                                                                                                                                                                                                                                                                                                                                                                                                                                                                                                                                                                                                                                                                                                                                                                                                                                                                                                                                             | 47.477                |
|                                                                                                                | #2          | 'knee'/exp OR 'knee':ti,ab,kw OR 'knees':ti,ab,kw OR 'patella'/exp OR 'patella':ti,ab,kw                                                                                                                                                                                                                                                                                                                                                                                                                                                                                                                                                                                                                                                                                                                                                                                                                                                                                                                                                                                                                                                                                                                                                                                                                                                                            | 251.661               |
|                                                                                                                | #3          | 'osteoarthritis'/exp OR 'osteoarthriti*':ti,ab,kw OR 'osteo-arthritis*':ti,ab,kw OR 'osteoarthrotic':ti,ab,kw OR 'osteoarthros*':ti,ab,kw OR 'osteo-arthros*':ti,ab,kw OR 'arthrosis':ti,ab,kw OR 'degenerative joint disease':ti,ab,kw OR 'arthritis':ti,ab,kw OR 'Arthritides':ti,ab,kw                                                                                                                                                                                                                                                                                                                                                                                                                                                                                                                                                                                                                                                                                                                                                                                                                                                                                                                                                                                                                                                                           | 463.296               |
| Concept 2:<br>Inflammation                                                                                     | #4          | 'synovitis'/de OR 'synovitis':ti,ab,kw OR 'hoffasynovitis':ti,ab,kw OR 'hoffa-synovitis':ti,ab,kw OR 'synovium'/exp OR 'synovium':ti,ab,kw OR 'Synovial Membrane':ti,ab,kw OR 'synovial fluid'/exp OR 'synovial fluid':ti,ab,kw OR 'synovial thickening':ti,ab,kw OR 'synovial proliferation':ti,ab,kw OR 'hydrarthrosis':ti,ab,kw OR 'joint effusion'/exp OR 'effusion':ti,ab,kw OR 'cytokine'/de OR 'cytokine*':ti,ab,kw OR 'chemokine*':ti,ab,kw OR 'interleukin*':ti,ab,kw OR 'IL-':ti,ab,kw OR 'Tumor Necrosis Factor*':ti,ab,kw OR 'TNF':ti,ab,kw OR 'c reactive protein'/exp OR 'c reactive protein':ti,ab,kw OR 'crp':ti,ab,kw OR 'matrix metalloproteinase'/exp OR 'matrix metalloproteinase':ti,ab,kw OR 'MMP':ti,ab,kw OR 'Bradykinin'/exp OR 'Bradykinin':ti,ab,kw OR 'inflammation'/de OR 'inflammation':ti,ab,kw OR 'biological marker'/exp OR 'biological marker*':ti,ab,kw OR 'biomarker*':ti,ab,kw OR 'bone marrow disease*':ti,ab,kw OR 'bone marrow lesion*':ti,ab,kw OR 'BML':ti,ab,kw OR 'BMLs':ti,ab,kw OR 'bone marrow edema':ti,ab,kw OR 'nuclear magnetic resonance imaging'/de OR 'nuclear magnetic resonance imaging':ti,ab,kw OR 'MRI':ti,ab,kw OR 'Ultrasonography':ti,ab,kw OR 'ultrasound'/exp OR 'ultrasound':ti,ab,kw OR 'US':ti,ab,kw OR 'synovial sample*':ti,ab,kw OR 'synovial biopsy':ti,ab,kw OR 'synovial biopsy*':ti,ab,kw | 4.889.875             |
| Concept 3:<br>Pain                                                                                             | #5          | 'central nervous system sensitization'/exp OR 'sensitization'/de OR 'sensitization':ti,ab,kw OR 'sensitisation':ti,ab,kw OR 'pain receptor'/exp OR 'pain receptor*':ti,ab,kw OR 'nociceptor*':ti,ab,kw OR 'quantitative sensory testing'/exp OR 'quantitative sensory testing':ti,ab,kw OR 'QST':ti,ab,kw OR 'postsynaptic potential summation'/exp OR 'postsynaptic potential summation':ti,ab,kw OR 'temporal summation':ti,ab,kw OR 'TS':ti,ab,kw OR 'pain modulation':ti,ab,kw OR 'CPM':ti,ab,kw OR 'Pain pressure threshold':ti,ab,kw OR 'PPT':ti,ab,kw OR 'algometry'/exp OR 'algometry':ti,ab,kw OR 'HPT':ti,ab,kw OR 'pain threshold'/exp OR 'pain threshold':ti,ab,kw OR 'sensory thresholds':ti,ab,kw OR 'allodynia'/exp OR 'allodynia':ti,ab,kw OR 'pain DETECT':ti,ab,kw OR 'PD-Q':ti,ab,kw OR 'PDQ':ti,ab,kw OR 'central sensitization inventory':ti,ab,kw OR 'CSI':ti,ab,kw OR 'hyperexcitability':ti,ab,kw OR 'Pain Perception':ti,ab,kw OR 'Central Sensitivity':ti,ab,kw OR 'Neural Inhibition':ti,ab,kw OR 'nociception'/exp OR 'nociception':ti,ab,kw OR 'Hypersensitivity':ti,ab,kw OR 'pain                                                                                                                                                                                                                                                    | 413.203               |

|                                      |                                   |                                                                                                                                                                                                                                                                                                                                                                                                                                                                                                                                                                |       |
|--------------------------------------|-----------------------------------|----------------------------------------------------------------------------------------------------------------------------------------------------------------------------------------------------------------------------------------------------------------------------------------------------------------------------------------------------------------------------------------------------------------------------------------------------------------------------------------------------------------------------------------------------------------|-------|
|                                      |                                   | processing':ti,ab,kw OR 'pain modulation':ti,ab,kw OR 'neuropathic pain'/exp OR 'neuropathic pain':ti,ab,kw OR 'neuropathic-like pain':ti,ab,kw OR 'nociceptive pain':ti,ab,kw OR 'pain pathophysiology':ti,ab,kw OR 'pain mechanism*':ti,ab,kw OR 'intermittent pain':ti,ab,kw OR 'ICOAP':ti,ab,kw OR 'widespread pain':ti,ab,kw OR 'Neuropathic Pain Questionnaire':ti,ab,kw OR 'NPQ':ti,ab,kw OR 'Douleur neuropathique':ti,ab,kw OR 'DN-4':ti,ab,kw OR 'DN4':ti,ab,kw OR 'Leeds Assessment of Neuropathic Symptoms and Signs':ti,ab,kw OR 'LANSS':ti,ab,kw |       |
| EMBASE<br>Combination<br>of concepts | (#1 OR (#2 AND #3)) AND #4 AND #5 |                                                                                                                                                                                                                                                                                                                                                                                                                                                                                                                                                                | 1.280 |

| Research question: association between joint inflammation and altered pain processing in patients with knee OA |             |                                                                                                                                                                                                                                                                                                                                                                                                                                                                                                                                                                                                                                                                                                                                                                                                                                                                                                                                                                                  |                       |
|----------------------------------------------------------------------------------------------------------------|-------------|----------------------------------------------------------------------------------------------------------------------------------------------------------------------------------------------------------------------------------------------------------------------------------------------------------------------------------------------------------------------------------------------------------------------------------------------------------------------------------------------------------------------------------------------------------------------------------------------------------------------------------------------------------------------------------------------------------------------------------------------------------------------------------------------------------------------------------------------------------------------------------------------------------------------------------------------------------------------------------|-----------------------|
| NAME OF DATABASE (interface): Web of Science                                                                   |             |                                                                                                                                                                                                                                                                                                                                                                                                                                                                                                                                                                                                                                                                                                                                                                                                                                                                                                                                                                                  |                       |
| Concept                                                                                                        | Line number | Search strategy                                                                                                                                                                                                                                                                                                                                                                                                                                                                                                                                                                                                                                                                                                                                                                                                                                                                                                                                                                  | Results (13 Dec 2022) |
| Concept 1:<br>Knee OA                                                                                          | #1          | TS=("osteoarthritis knee" OR "knee osteoarthritis" OR "gonarthrosis" OR "Osteoarthritis of Knee" OR "Osteoarthritis of Knees" OR "Knee OA")                                                                                                                                                                                                                                                                                                                                                                                                                                                                                                                                                                                                                                                                                                                                                                                                                                      | 30.499                |
|                                                                                                                | #2          | TS=("knee" OR "knees" OR "Patella")                                                                                                                                                                                                                                                                                                                                                                                                                                                                                                                                                                                                                                                                                                                                                                                                                                                                                                                                              | 214.028               |
|                                                                                                                | #3          | TS=("osteoarthriti*" OR "osteo-arthritis*" OR "osteoarthrotic" OR "osteoarthros*" OR "osteo-arthros*" OR "arthrosis" OR "degenerative joint disease" OR "arthritis" OR "Arthritides")                                                                                                                                                                                                                                                                                                                                                                                                                                                                                                                                                                                                                                                                                                                                                                                            | 393.347               |
| Concept 2:<br>Inflammation                                                                                     | #4          | TS=("Synovitis" OR "hoffasynovitis" OR "hoffa-synovitis" OR "Synovial Membrane" OR "synovial fluid*" OR "synovial thickening" OR "synovial proliferation" OR "Hydrarthrosis" OR "Effusion" OR "Cytokine*" OR "chemokine*" OR "interleukin*" OR "IL-" OR "Tumor Necrosis Factor*" OR "TNF" OR "C-Reactive Protein" OR "CRP" OR "Matrix Metalloproteinases" OR "Matrix Metalloproteinase*" OR "MMP" OR "Bradykinin" OR "Inflammation" OR "Biomarker*" OR "biological marker*" OR "bone marrow disease*" OR "bone marrow lesion*" OR "BML" OR "BMLs" OR "bone marrow edema" OR "Magnetic Resonance Imaging" OR "MRI" OR "Ultrasonography" OR "US" OR "synovial sample*" OR "synovial biopsy" OR "synovial biopsy*")                                                                                                                                                                                                                                                                 | 3.894.593             |
| Concept 3:<br>Pain                                                                                             | #5          | TS=("Sensitization" OR "Sensitisation" OR "pain receptor*" OR "Nociceptor*" OR "quantitative sensory testing" OR "QST" OR "Postsynaptic Potential Summation" OR "temporal summation" OR "TS" OR "pain modulation" OR "CPM" OR "Pain pressure threshold" OR "PPT" OR "algometry" OR "HPT" OR "sensory thresholds" OR "allodynia" OR "pain DETECT" OR "PD-Q" OR "PDQ" OR "central sensitization inventory" OR "CSI" OR "Hyperexcitability" OR "Pain Perception" OR "Pain Threshold" OR "Central Sensitivity" OR "Neural Inhibition" OR "Hyperalgesia" OR "nociception" OR "Hypersensitivity" OR "pain processing" OR "pain modulation" OR "neuropathic pain" OR "neuropathic-like pain" OR "nociceptive pain" OR "pain pathophysiology" OR "pain mechanism*" OR "intermittent pain" OR "ICOAP" OR "widespread pain" OR "Neuropathic Pain Questionnaire" OR "NPQ" OR "Douleur neuropathique" OR "DN-4" OR "DN4" OR "Leeds Assessment of Neuropathic Symptoms and Signs" OR "LANSS") | 365.027               |
| WoS                                                                                                            |             | (#1 OR (#2 AND #3)) AND #4 AND #5                                                                                                                                                                                                                                                                                                                                                                                                                                                                                                                                                                                                                                                                                                                                                                                                                                                                                                                                                | 956                   |

|                         |  |  |
|-------------------------|--|--|
| Combination of concepts |  |  |
|-------------------------|--|--|

| Research question: association between joint inflammation and altered pain processing in patients with knee OA |             |                                                                                                                                                                                                                                                                                                                                                                                                                                                                                                                                                                                                                                                                                                                                                                                                                                                                                                                                                                               |                       |
|----------------------------------------------------------------------------------------------------------------|-------------|-------------------------------------------------------------------------------------------------------------------------------------------------------------------------------------------------------------------------------------------------------------------------------------------------------------------------------------------------------------------------------------------------------------------------------------------------------------------------------------------------------------------------------------------------------------------------------------------------------------------------------------------------------------------------------------------------------------------------------------------------------------------------------------------------------------------------------------------------------------------------------------------------------------------------------------------------------------------------------|-----------------------|
| NAME OF DATABASE: SCOPUS                                                                                       |             |                                                                                                                                                                                                                                                                                                                                                                                                                                                                                                                                                                                                                                                                                                                                                                                                                                                                                                                                                                               |                       |
| Concept                                                                                                        | Line number | Search strategy                                                                                                                                                                                                                                                                                                                                                                                                                                                                                                                                                                                                                                                                                                                                                                                                                                                                                                                                                               | Results (13 Dec 2022) |
| Concept 1:<br>Knee OA                                                                                          | #1          | ("osteoarthritis knee" OR "knee osteoarthritis" OR "gonarthrosis" OR "Osteoarthritis of Knee" OR "Osteoarthritis of Knees" OR "Knee OA")                                                                                                                                                                                                                                                                                                                                                                                                                                                                                                                                                                                                                                                                                                                                                                                                                                      | 43.835                |
|                                                                                                                | #2          | ("knee" OR "knees" OR "Patella")                                                                                                                                                                                                                                                                                                                                                                                                                                                                                                                                                                                                                                                                                                                                                                                                                                                                                                                                              | 289.219               |
|                                                                                                                | #3          | ("osteoarthriti*" OR "osteo-arthritis*" OR "osteoarthrotic" OR "osteoarthros*" OR "osteo-arthros*" OR "arthrosis" OR "degenerative joint disease" OR "arthritis" OR "Arthritides")                                                                                                                                                                                                                                                                                                                                                                                                                                                                                                                                                                                                                                                                                                                                                                                            | 471.936               |
| Concept 2:<br>Inflammation                                                                                     | #4          | ("Synovitis" OR "hoffasynovitis" OR "hoffa-synovitis" OR "Synovial Membrane" OR "synovial fluid*" OR "synovial thickening" OR "synovial proliferation" OR "Hydrarthrosis" OR "Effusion" OR "Cytokine*" OR "chemokine*" OR "interleukin*" OR "IL-" OR "Tumor Necrosis Factor*" OR "TNF" OR "C-Reactive Protein" OR "CRP" OR "Matrix Metalloproteinases" OR "Matrix Metalloproteinase*" OR "MMP" OR "Bradykinin" OR "Inflammation" OR "Biomarker*" OR "biological marker*" OR "bone marrow disease*" OR "bone marrow lesion*" OR "BML" OR "BMLs" OR "bone marrow edema" OR "Magnetic Resonance Imaging" OR "MRI" OR "Ultrasonography" OR "US" OR "synovial sample*" OR "synovial biopsy" OR "synovial biopsy*")                                                                                                                                                                                                                                                                 | 5.607.872             |
| Concept 3:<br>Pain                                                                                             | #5          | ("Sensitization" OR "Sensitisation" OR "pain receptor*" OR "Nociceptor*" OR "quantitative sensory testing" OR "QST" OR "Postsynaptic Potential Summation" OR "temporal summation" OR "TS" OR "pain modulation" OR "CPM" OR "Pain pressure threshold" OR "PPT" OR "algometry" OR "HPT" OR "sensory thresholds" OR "allodynia" OR "pain DETECT" OR "PD-Q" OR "PDQ" OR "central sensitization inventory" OR "CSI" OR "Hyperexcitability" OR "Pain Perception" OR "Pain Threshold" OR "Central Sensitivity" OR "Neural Inhibition" OR "Hyperalgesia" OR "nociception" OR "Hypersensitivity" OR "pain processing" OR "pain modulation" OR "neuropathic pain" OR "neuropathic-like pain" OR "nociceptive pain" OR "pain pathophysiology" OR "pain mechanism*" OR "intermittent pain" OR "ICOAP" OR "widespread pain" OR "Neuropathic Pain Questionnaire" OR "NPQ" OR "Douleur neuropathique" OR "DN-4" OR "DN4" OR "Leeds Assessment of Neuropathic Symptoms and Signs" OR "LANSS") | 632.482               |
| SCOPUS                                                                                                         |             | (#1 OR (#2 AND #3)) AND #4 AND #5                                                                                                                                                                                                                                                                                                                                                                                                                                                                                                                                                                                                                                                                                                                                                                                                                                                                                                                                             | 1.182                 |

|                         |  |  |
|-------------------------|--|--|
| Combination of concepts |  |  |
|-------------------------|--|--|

No additional filters were applied

No publication date was restricted
